# Supplementary material for: Training in Mindfulness or Loving-kindness Meditation Is Associated with Lower Variability in Social Connectedness Across Time
Source: Springer Nature journal article supplement (doi:10.1007/s12671-022-01856-0), 2022-04-04
Supplement: MOESM1 [file 20284180]

**Ancillary Table 1***Growth Curve with Mean Levels as a Moderator*

|                                                          | <i>B</i> | <i>p</i> | 95% <i>CI</i> |              |
|----------------------------------------------------------|----------|----------|---------------|--------------|
|                                                          |          |          | <i>Lower</i>  | <i>Upper</i> |
| Intercept                                                | 1.31     | <.001    | 1.08          | 1.54         |
| Week                                                     | -0.10    | .02      | -0.18         | -0.02        |
| Week <sup>2</sup>                                        | 0.01     | .03      | 0.001         | 0.01         |
| Weekly Social Connectedness <i>M</i>                     | -0.11    | <.001    | -0.15         | -0.06        |
| Condition                                                | -0.02    | .79      | -0.15         | 0.12         |
| Condition * Week                                         | -0.01    | .76      | -0.05         | 0.04         |
| Condition * Week <sup>2</sup>                            | 0.001    | .62      | -0.003        | 0.004        |
| Weekly Social Connectedness <i>M</i> * Week              | 0.01     | .55      | -0.01         | 0.02         |
| Weekly Social Connectedness <i>M</i> * Week <sup>2</sup> | -0.001   | .39      | -0.002        | 0.001        |
